# Supplementary material for: A WS2 nanosheet-based platform for fluorescent DNA detection via PNA–DNA hybridization
Source: Royal Society of Chemistry journal article supplement (doi:10.1039/c4an01738b), 2014-11-07
Supplement: c4an01738b1.pdf [file c4an01738b1.pdf]

## Supporting Information:

### A WS<sub>2</sub> nanosheet-based platform for fluorescent DNA detection via PNA-DNA hybridization

Shuting Wang, Yulin Zhang, Yong Ning, Guo-Jun Zhang

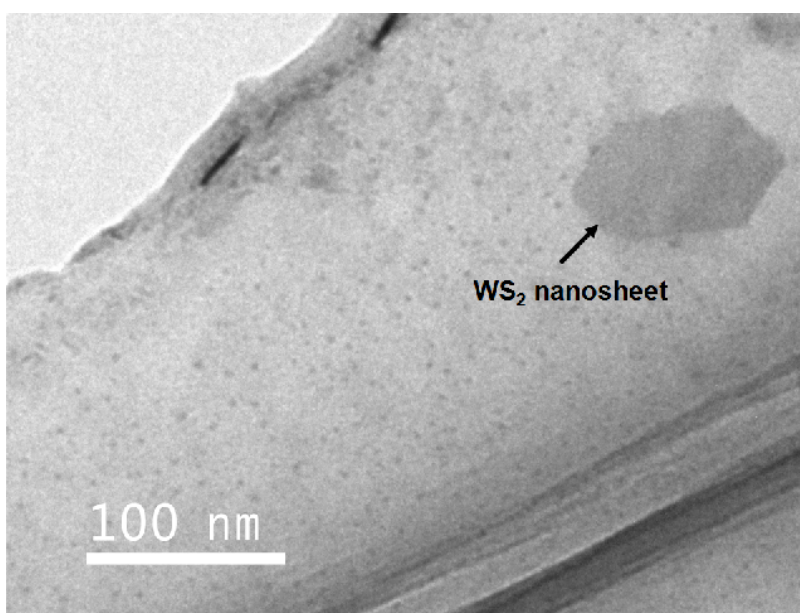

Fig. S1 TEM image of a WS<sub>2</sub> nanosheet.

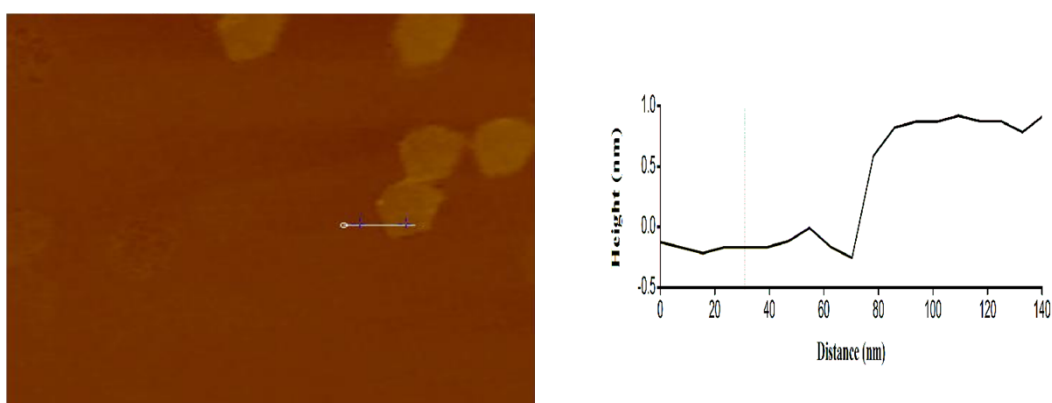

Fig. S2 AFM images showing the morphological feature of the WS<sub>2</sub> nanosheets and height profiles of the nanosheets on silicon substrate.
